# Supplementary material for: Boron-centered soft ligands based on tetrazole units and their complexes with sodium, potassium and bismuth ions
Source: Royal Society of Chemistry journal article supplement (doi:10.1039/c4dt01931h), 2014-07-16
Supplement: c4dt01931h1.pdf [file c4dt01931h1.pdf]

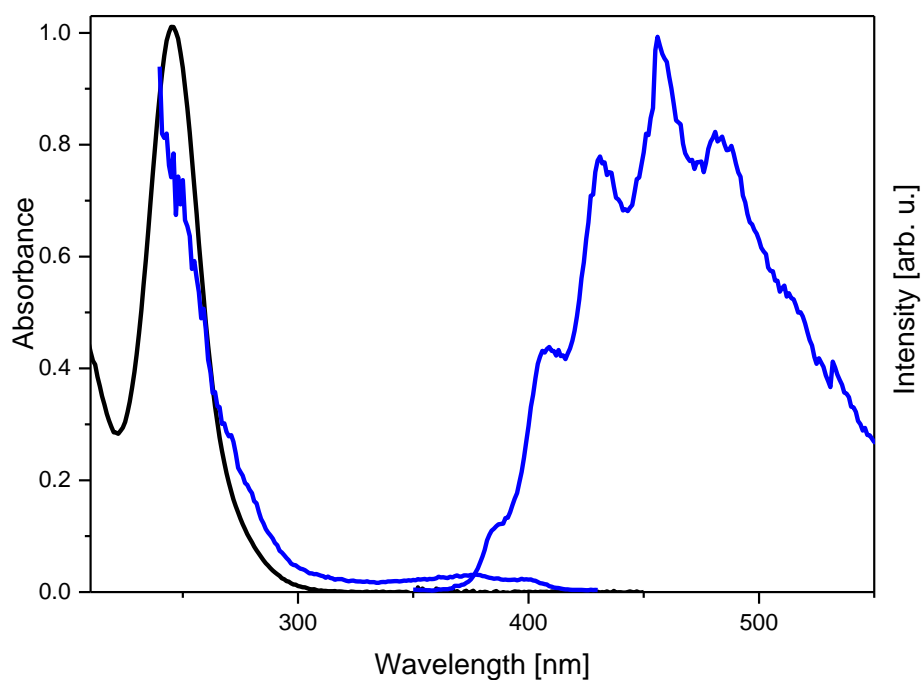

**Figure S1.** Absorption spectrum of **1** in ethanol (black,  $c = 3.1 \cdot 10^{-5}$  mol/l). Emission and excitation spectra of **1** in ethanol glass at 77 K (blue,  $\lambda_{\text{exc}} = 280$  nm,  $\lambda_{\text{det}} = 450$  nm).

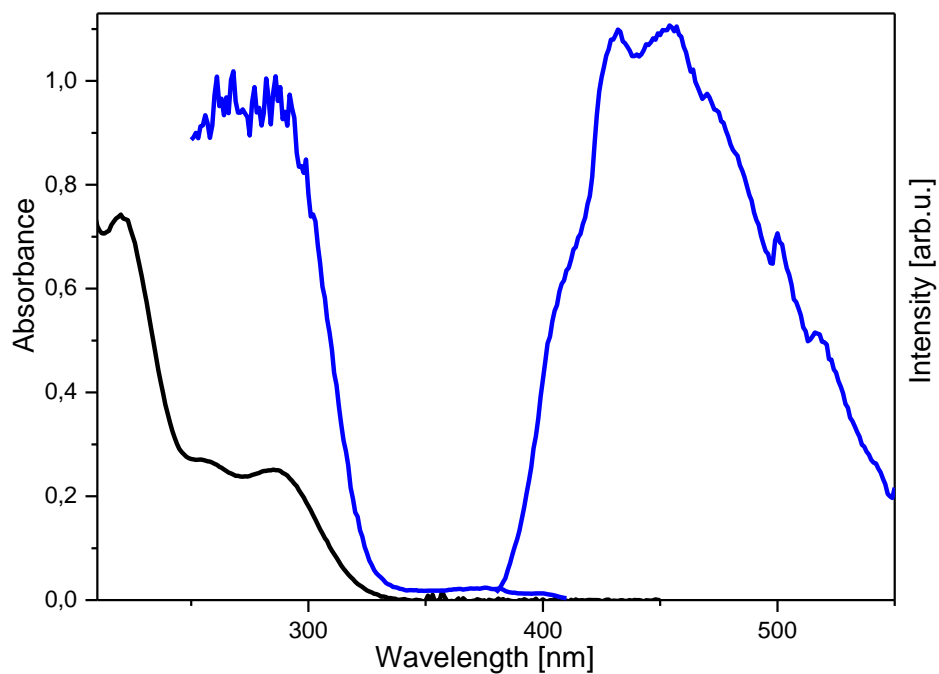

**Figure S2.** Absorption spectrum of **4** in ethanol (black,  $c = 2.5 \cdot 10^{-5}$  mol/l). Emission and excitation spectra of **4** in ethanol glass at 77 K (blue,  $\lambda_{\text{exc}} = 280$  nm,  $\lambda_{\text{det}} = 430$  nm).

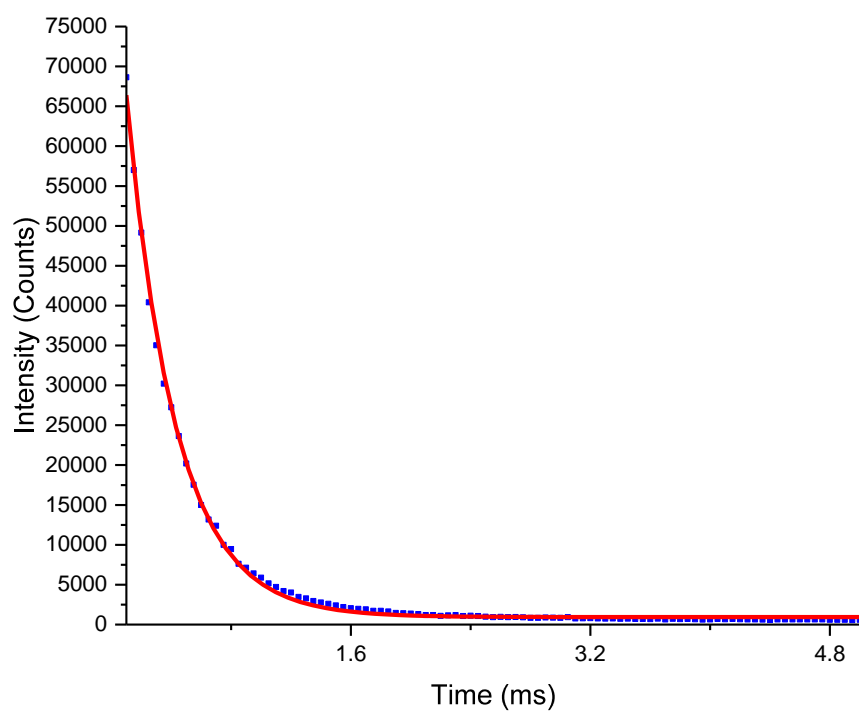

**Figure S3.** Emission decay of **5** in EtOH at 77 K ( $\lambda_{\text{exc}} = 300$  nm,  $\lambda_{\text{det}} = 550$  nm,  $c = 0.9 \cdot 10^{-5}$  mol/l). Emission decay time  $\tau = 0.33$  ms.

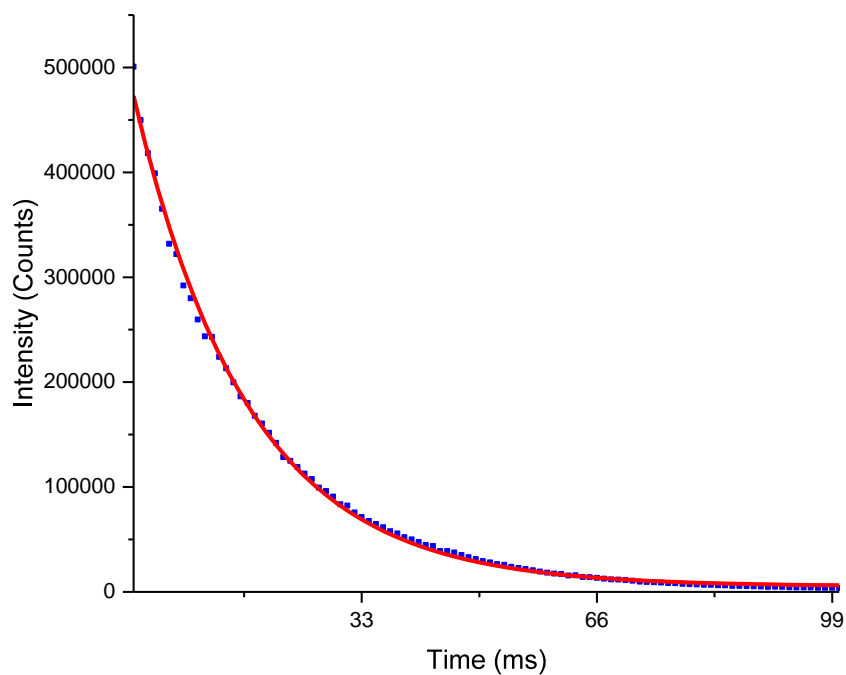

**Figure S4.** Emission decay of **7** in EtOH at 77 K ( $\lambda_{\text{exc}} = 285$  nm,  $\lambda_{\text{det}} = 450$  nm,  $c = 2.6 \cdot 10^{-5}$  mol/l). Emission decay time  $\tau = 16.1$  ms.
